# Supplementary material for: Sustainable Ca-TiO 2 paper platforms: exploiting eggshell biowaste for environmental remediation
Source: Royal Society of Chemistry journal article supplement (doi:10.1039/d5en00864f), 2026-01-01
Supplement: d5en00864f1.pdf [file d5en00864f1.pdf]

## Sustainable Ca-TiO<sub>2</sub> Paper Platforms: Exploiting Eggshell Biowaste for Environmental remediation

Beatrice Canova<sup>1,3</sup>, Maria Leonor Matias<sup>1</sup>, Maria Magalhães<sup>1</sup>, Ana Pimentel<sup>1</sup>, Andreia Matzinhos<sup>2</sup>, Catarina Pinto Reis<sup>2,3</sup>, Jonas Deuermeier<sup>1</sup>, Rodrigo Martins<sup>1,\*</sup>, Elvira Fortunato<sup>1,\*</sup>, Chiara Bisio<sup>4</sup>, Daniela Nunes<sup>1,\*</sup>

<sup>1</sup>CENIMAT|i3N, Department of Materials Science, School of Science and Technology, NOVA University Lisbon and CEMOP/UNINOVA, 2829-516 Caparica, Portugal

<sup>2</sup>Research Institute for Medicines (iMed.Ulisboa), Faculty of Pharmacy, Universidade de Lisboa, Av. Professor Gama Pinto, 1649-003 Lisboa, Portugal

<sup>3</sup>Instituto de Biofísica e Engenharia Biomédica (IBEB), Faculdade de Ciências, Universidade de Lisboa, Campo Grande, 1749-016 Lisboa, Portugal

<sup>4</sup>Dipartimento di Scienze e Innovazione Tecnologica DISIT, Università del Piemonte Orientale "A. Avogadro", viale T. Michel 11, 15121 Alessandria, Italy

\*Corresponding authors: Daniela Nunes, Rodrigo Martins, and Elvira Fortunato, e-mails: [daniela.gomes@fct.unl.pt](mailto:daniela.gomes@fct.unl.pt), [rm@uninova.pt](mailto:rm@uninova.pt), and [emf@fct.unl.pt](mailto:emf@fct.unl.pt).

\*Corresponding authors: Daniela Nunes, Rodrigo Martins, and Elvira Fortunato, e-mails: [daniela.gomes@fct.unl.pt](mailto:daniela.gomes@fct.unl.pt), [rm@uninova.pt](mailto:rm@uninova.pt), and [emf@fct.unl.pt](mailto:emf@fct.unl.pt).

### Supporting information

Figure S1 evidences the presence of highly defective nanocrystals for the Ca-TiO<sub>2</sub> nanopowders.

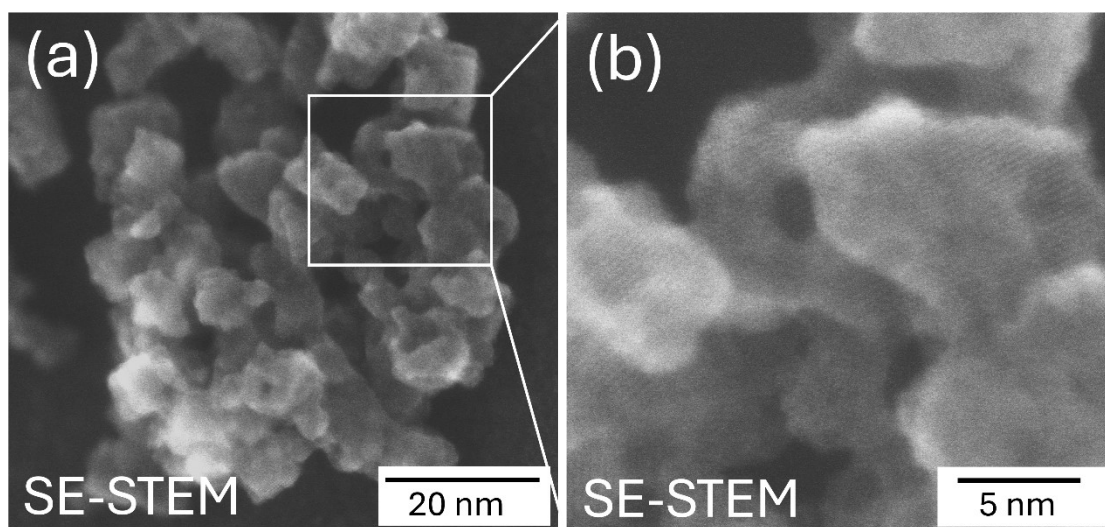

Figure S1. SE-STEM images of defective Ca-TiO<sub>2</sub> nanocrystals.

Figure S2 shows the Raman spectra obtained analyzing functionalized paper,  $\text{TiO}_2$  and  $\text{Ca-TiO}_2$  paper-based platforms.

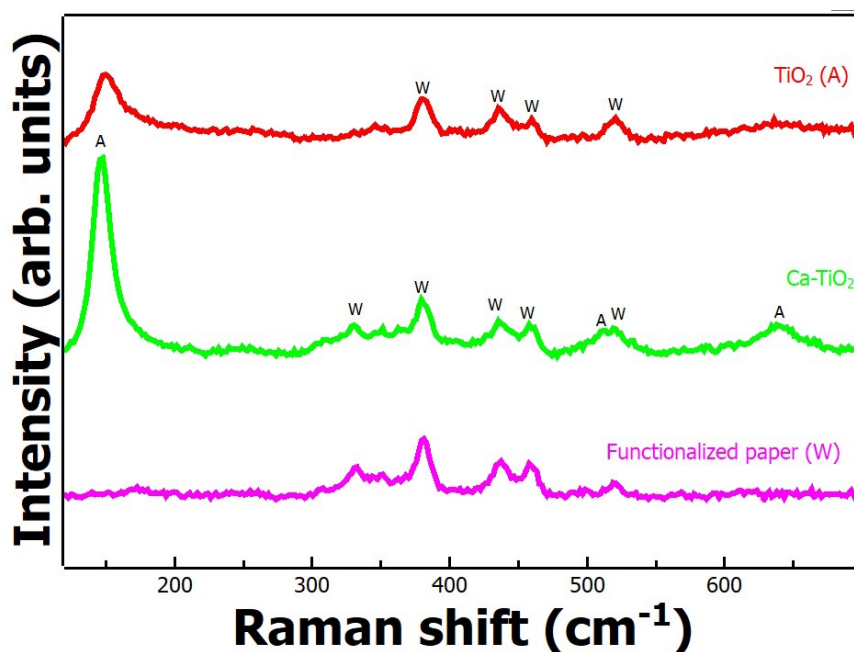

Figure S2. Raman spectra of the functionalized paper, and both  $\text{TiO}_2$  and  $\text{Ca-TiO}_2$  paper-based platforms..

Figure S3 shows the static contact angle measurements of functionalized paper and  $\text{Ca-TiO}_2$  paper-based platforms.

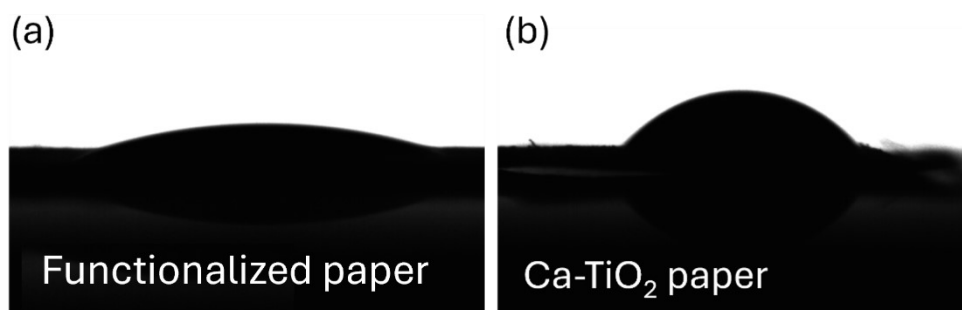

Figure S3. Static contact angle of (a) Whatman functionalized paper and (b)  $\text{Ca-TiO}_2$  paper-based platform.

Figure S4 shows the calibration line of tetracycline obtained from RT UV-VIS absorption spectra with various concentrations of 5, 10, 15, 20 and 30 ppm.

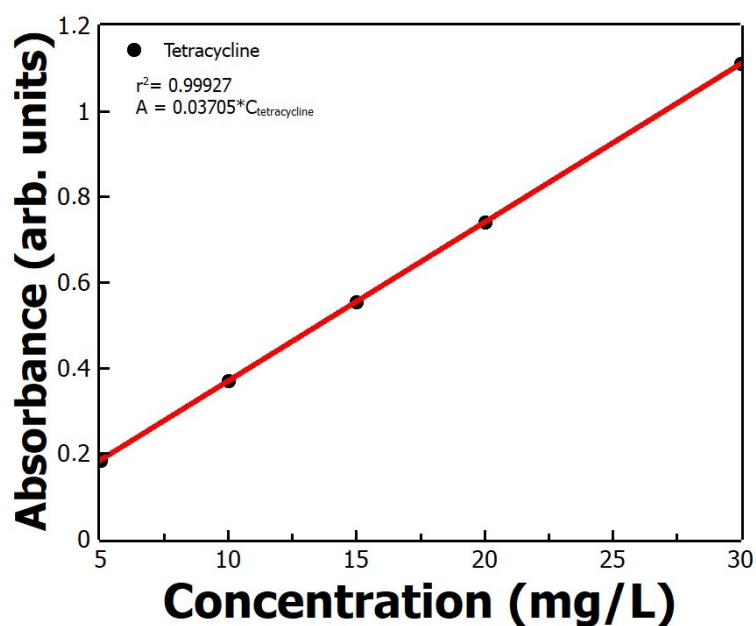

Figure S4. Calibration line of tetracycline obtained from RT UV-VIS absorption spectra with various concentrations of 5, 10, 15, 20 and 30 ppm.

Figure S5 shows the SEM images of the Ca-TiO<sub>2</sub> paper-based platform before and after ten consecutive photocatalytic cycles. It is clear the accumulation of residues or tetracycline by-products. No regeneration process has been carried out between cycles.

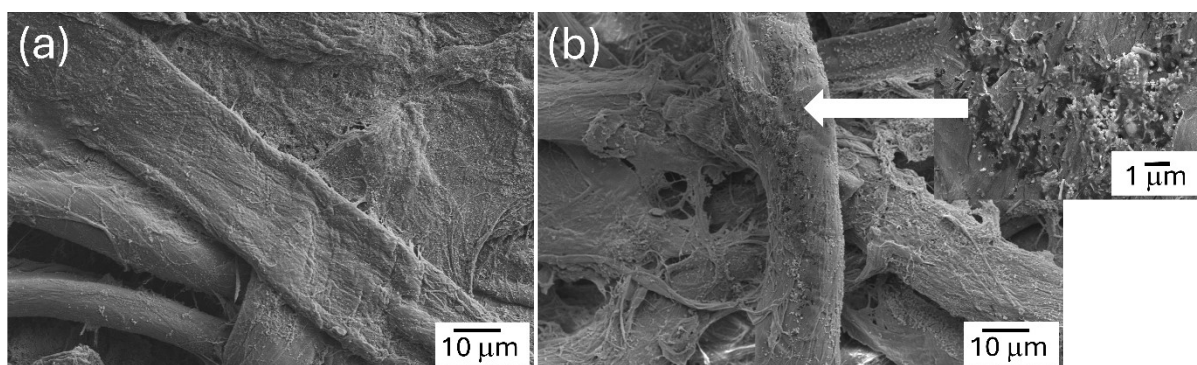

Figure S5. SEM images of the Ca-TiO<sub>2</sub> paper-based platform (a) before and (b) after ten cycling experiments.
